# Supplementary material for: Promoting Neuronal Outgrowth Using Ridged Scaffolds Coated with Extracellular Matrix Proteins
Source: MDPI journal article supplement (doi:10.3390/biomedicines9050479), 2021-04-27
Supplement: s1 [file s1]

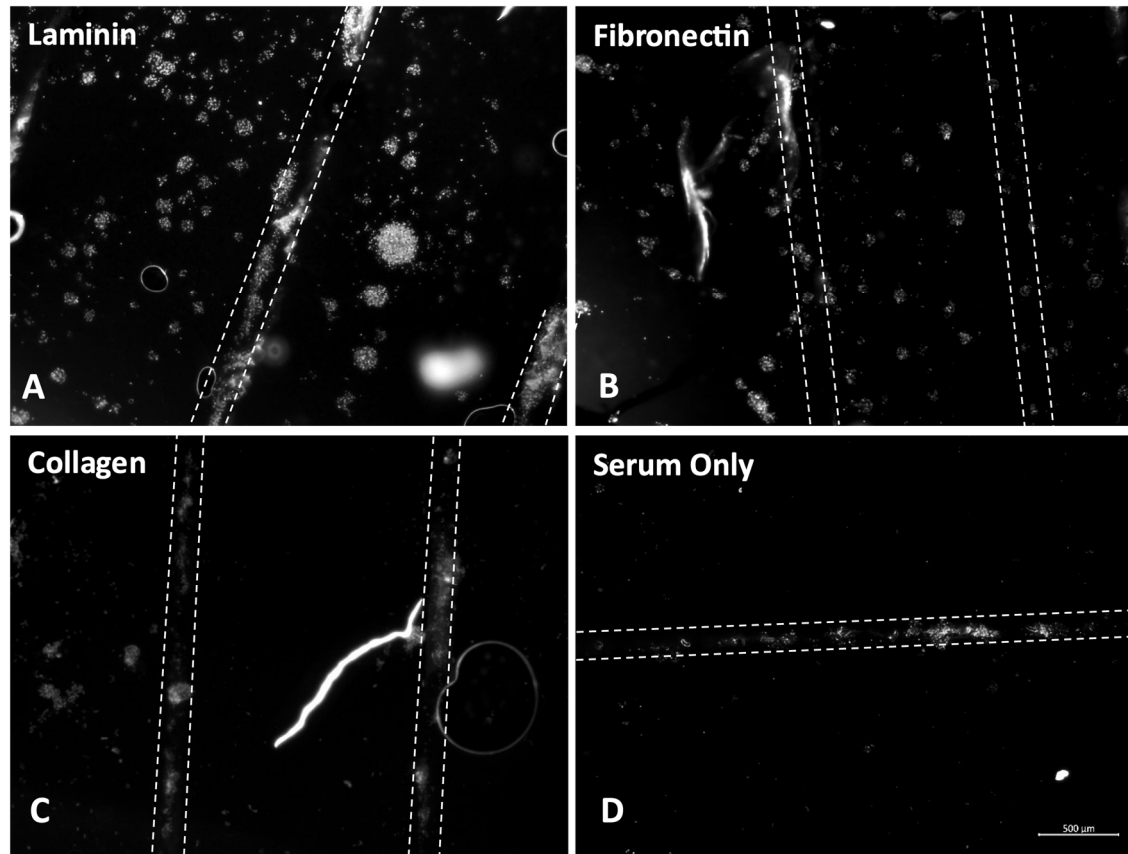

**Figure S1.** DAPI staining of dissociated DRG neurons on OPF+ scaffold sheets with ridges 1 mm apart. The sheets were coated with (A) Laminin, (B) Fibronectin, (C) Collagen, and (D) Serum only. Number of cells on and off ridges was determined by DAPI co-labelled with b-III tubulin (Figure 3).
